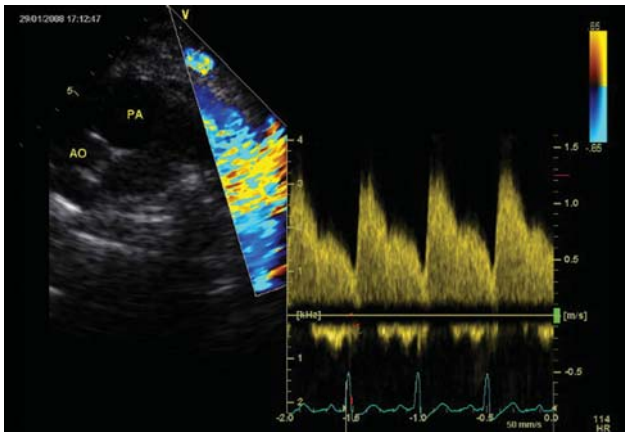

**Figure 2** Pulsed-wave mode showing a typical arterial flow with maximal systolic velocities reaching 1.4 m/s and maximal diastolic velocities reaching 0.6 m/s. PA, pulmonary artery; AO, aortic valve.

In our case, the detection of a striking flow occurring at close proximity of the heart allowed to explain the murmur, after ruling out any other origin of continuous murmur (patent ductus arteriosus, coronary arteriovenous fistula, ruptured aneurysm of sinus of Valsalva, ...), avoiding unnecessary and potentially dangerous diagnostic procedure as coronary angiography, transoesophageal echocardiography, or coro-CT.

In this case, the normal pattern limited to systolic flow in the internal mammary artery, which is a high-resistance artery, was replaced by a biphasic flow, with two components, as seen with lower resistance artery. We hypothesize that the high metabolic activity and the development of collaterals occurring during lactation induce a drop in micro- and macrovascular resistance, allowing the diastolic component of flow to occur.

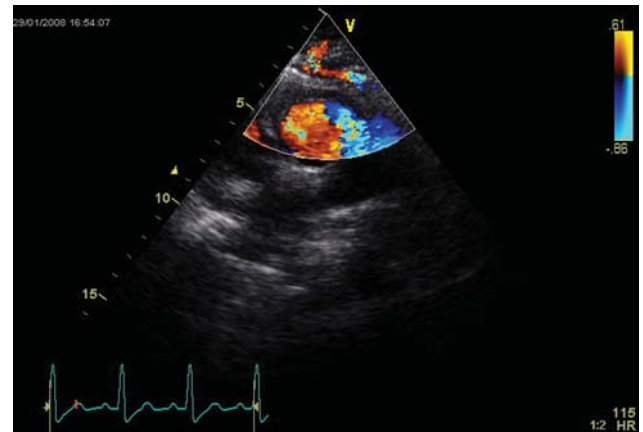

**Figure 3** Colour-flow Doppler echocardiogram showing the tortuous trajectory followed over a distance of several centimetres.

Higher frequency transducer might allow better visualization of dilatation of small arterial branches, which would further confirm the low-resistance status.

Our cardiac echography and Doppler confirm, for the first time, the arterial nature of this murmur described one century ago and recognized as the third differential diagnosis in order of frequency of continuous thoracic murmurs, after cervical venous hum and patent ductus arteriosus<sup>3</sup>.

## References

1. Van der Bergh A. Een Schijnbaar Hartgeruisch. *Nederl. Tijdscht Geneesk* 1908;**52**:1104.
2. Tabatznik B., Randall T., Hersch C. The mammary soufflé of pregnancy and lactation. *Circulation* 1960;**22**:1069–73.
3. Sapira JD. *The Art and Science of Bedside Diagnosis*. Baltimore: Urban & Schwarzenberg, Lippincott Williams & Wilkins, 1990.
